# Supplementary material for: A Furin Cleavage Site Inserted into the Spike Protein of SARS-CoV-2: A Structural Implication?
Source: Preprints.org preprint supplement (doi:10.20944/preprints202003.0428.v1), 2020-03-29
Supplement: Supplementary file 1 [file supplementary]

# A Furin Cleavage Site Inserted into the Spike Protein of SARS-CoV-2: A Structural Implication? Supplementary Materials

Wei Li\*

March 26, 2020

---

\*Institute of Special Environment Medicine, Nantong University, No. 9, Seyuan Road, Nantong City, Jiangsu Province, P. R. China

## List of Tables

|   |                                                               |    |
|---|---------------------------------------------------------------|----|
| 1 | Salt bridging network analysis . . . . .                      | 7  |
| 2 | Counting of salt bridges . . . . .                            | 9  |
| 3 | Side chain and main chain hydrogen bonding analysis . . . . . | 10 |
| 4 | Side chain hydrogen bonding analysis . . . . .                | 11 |
| 5 | Interfacial salt bridging network analysis . . . . .          | 12 |
| 6 | Counting of interfacial salt bridges . . . . .                | 13 |

## Supporting Material

| PDB ID | Residue A  | Atom A | Residue B  | Atom B | Distance (Å) |
|--------|------------|--------|------------|--------|--------------|
| MODEL  | A_ARG_34   | NH1    | A_GLU_191  | OE2    | 2.674        |
| MODEL  | A_ARG_44   | NH1    | A_ASP_40   | OD1    | 2.695        |
| MODEL  | A_ARG_44   | NH1    | A_ASP_40   | OD2    | 3.232        |
| MODEL  | A_ARG_44   | NH2    | A_ASP_40   | OD1    | 3.625        |
| MODEL  | A_ARG_44   | NH2    | A_ASP_40   | OD2    | 2.635        |
| MODEL  | A_ARG_78   | NH1    | A_ASP_138  | OD2    | 2.688        |
| MODEL  | A_ARG_102  | NH1    | A_GLU_96   | OE1    | 3.329        |
| MODEL  | A_LYS_195  | NZ     | A_ASP_53   | OD1    | 2.683        |
| MODEL  | A_LYS_195  | NZ     | A_ASP_53   | OD2    | 2.722        |
| MODEL  | A_LYS_206  | NZ     | A_GLU_224  | OE1    | 2.749        |
| MODEL  | A_LYS_206  | NZ     | A_GLU_224  | OE2    | 2.697        |
| MODEL  | A_ARG_214  | NH1    | A_ASP_215  | OD1    | 2.721        |
| MODEL  | A_ARG_214  | NH1    | A_ASP_215  | OD2    | 3.669        |
| MODEL  | A_ARG_273  | NH2    | A_ASP_290  | OD1    | 2.616        |
| MODEL  | A_ARG_273  | NH2    | A_ASP_290  | OD2    | 3.058        |
| MODEL  | A_LYS_278  | NZ     | A_ASP_287  | OD2    | 3.755        |
| MODEL  | A_LYS_310  | NZ     | A_ASP_663  | OD1    | 2.628        |
| MODEL  | A_LYS_310  | NZ     | A_ASP_663  | OD2    | 2.667        |
| MODEL  | A_ARG_319  | NH1    | B_ASP_737  | OD2    | 2.735        |
| MODEL  | A_ARG_319  | NH1    | B_ASP_745  | OD1    | 3.587        |
| MODEL  | A_ARG_319  | NH2    | B_ASP_737  | OD2    | 3.982        |
| MODEL  | A_ARG_328  | NH1    | A_ASP_578  | OD2    | 3.263        |
| MODEL  | A_ARG_328  | NH2    | A_ASP_578  | OD2    | 3.964        |
| MODEL  | A_ARG_355  | NH2    | A_ASP_398  | OD1    | 3.101        |
| MODEL  | A_ARG_355  | NH2    | A_ASP_398  | OD2    | 2.632        |
| MODEL  | A_LYS_356  | NZ     | A_GLU_340  | OE1    | 2.636        |
| MODEL  | A_ARG_403  | NH1    | A_GLU_406  | OE2    | 3.089        |
| MODEL  | A_LYS_458  | NZ     | A_GLU_471  | OE1    | 2.430        |
| MODEL  | A_ARG_466  | NH1    | A_ASP_467  | OD1    | 3.188        |
| MODEL  | A_ARG_466  | NH1    | A_ASP_467  | OD2    | 2.659        |
| MODEL  | A_ARG_509  | NH1    | A_ASP_442  | OD1    | 2.803        |
| MODEL  | A_ARG_509  | NH1    | A_ASP_442  | OD2    | 3.407        |
| MODEL  | A_LYS_537  | NZ     | A_GLU_324  | OE1    | 2.730        |
| MODEL  | A_LYS_537  | NZ     | A_GLU_324  | OE2    | 2.652        |
| MODEL  | A_LYS_557  | NZ     | A_ASP_568  | OD1    | 2.715        |
| MODEL  | A_LYS_557  | NZ     | A_ASP_568  | OD2    | 2.782        |
| MODEL  | A_LYS_557  | NZ     | A_ASP_574  | OD1    | 2.869        |
| MODEL  | A_LYS_557  | NZ     | A_ASP_574  | OD2    | 2.649        |
| MODEL  | A_ARG_567  | NH1    | A_ASP_571  | OD1    | 2.606        |
| MODEL  | A_ARG_567  | NH2    | A_ASP_571  | OD1    | 2.720        |
| MODEL  | A_LYS_733  | NZ     | A_ASP_775  | OD1    | 3.202        |
| MODEL  | A_LYS_733  | NZ     | A_ASP_775  | OD2    | 2.601        |
| MODEL  | A_LYS_790  | NZ     | C_GLU_702  | OE1    | 2.623        |
| MODEL  | A_LYS_790  | NZ     | C_GLU_702  | OE2    | 2.744        |
| MODEL  | A_LYS_811  | NZ     | A_ASP_820  | OD2    | 2.461        |
| MODEL  | A_ARG_815  | NH1    | A_ASP_820  | OD1    | 2.649        |
| MODEL  | A_LYS_986  | NZ     | A_GLU_748  | OE2    | 2.597        |
| MODEL  | A_ARG_995  | NH1    | B_ASP_994  | OD1    | 3.497        |
| MODEL  | A_ARG_995  | NH1    | B_ASP_994  | OD2    | 2.691        |
| MODEL  | A_ARG_995  | NH2    | B_ASP_994  | OD1    | 2.657        |
| MODEL  | A_ARG_995  | NH2    | B_ASP_994  | OD2    | 3.473        |
| MODEL  | A_ARG_1019 | NH1    | A_GLU_773  | OE1    | 2.777        |
| MODEL  | A_ARG_1019 | NH2    | A_GLU_780  | OE1    | 3.073        |
| MODEL  | A_ARG_1019 | NH2    | A_GLU_780  | OE2    | 3.823        |
| MODEL  | A_LYS_1028 | NZ     | A_GLU_725  | OE1    | 2.878        |
| MODEL  | A_LYS_1028 | NZ     | A_GLU_725  | OE2    | 2.589        |
| MODEL  | A_ARG_1039 | NH1    | A_GLU_1031 | OE1    | 2.697        |

|       |            |     |            |     |       |
|-------|------------|-----|------------|-----|-------|
| MODEL | A_ARG.1039 | NH1 | A_GLU.1031 | OE2 | 3.642 |
| MODEL | A_ARG.1039 | NH2 | B_GLU.1031 | OE1 | 3.621 |
| MODEL | A_ARG.1039 | NH2 | B_GLU.1031 | OE2 | 2.620 |
| MODEL | A_HIS.1064 | NE2 | A_GLU.725  | OE1 | 2.720 |
| MODEL | A_HIS.1083 | ND1 | A_ASP.1084 | OD1 | 3.726 |
| MODEL | A_HIS.1083 | NE2 | A_ASP.1084 | OD1 | 2.954 |
| MODEL | A_HIS.1083 | NE2 | A_ASP.1084 | OD2 | 3.064 |
| MODEL | A_LYS.1086 | NZ  | A_ASP.1084 | OD2 | 2.860 |
| MODEL | B_ARG.34   | NH1 | B_GLU.191  | OE2 | 2.594 |
| MODEL | B_ARG.78   | NH2 | B_ASP.80   | OD1 | 3.853 |
| MODEL | B_ARG.78   | NH2 | B_ASP.80   | OD2 | 3.115 |
| MODEL | B_LYS.195  | NZ  | B_ASP.53   | OD1 | 2.671 |
| MODEL | B_LYS.195  | NZ  | B_ASP.53   | OD2 | 2.656 |
| MODEL | B_LYS.206  | NZ  | B_GLU.224  | OE1 | 3.459 |
| MODEL | B_LYS.206  | NZ  | B_GLU.224  | OE2 | 2.611 |
| MODEL | B_ARG.273  | NH2 | B_ASP.290  | OD1 | 2.633 |
| MODEL | B_ARG.273  | NH2 | B_ASP.290  | OD2 | 3.259 |
| MODEL | B_LYS.278  | NZ  | B_ASP.287  | OD2 | 2.604 |
| MODEL | B_LYS.310  | NZ  | B_ASP.663  | OD1 | 2.691 |
| MODEL | B_LYS.310  | NZ  | B_ASP.663  | OD2 | 2.615 |
| MODEL | B_ARG.319  | NH1 | C_ASP.745  | OD1 | 2.606 |
| MODEL | B_ARG.319  | NH1 | C_ASP.745  | OD2 | 3.565 |
| MODEL | B_ARG.319  | NH2 | C_ASP.745  | OD1 | 3.325 |
| MODEL | B_ARG.319  | NH2 | C_ASP.745  | OD2 | 2.636 |
| MODEL | B_ARG.328  | NH1 | B_ASP.578  | OD2 | 3.286 |
| MODEL | B_ARG.328  | NH2 | B_ASP.578  | OD1 | 3.906 |
| MODEL | B_ARG.328  | NH2 | B_ASP.578  | OD2 | 2.659 |
| MODEL | B_ARG.355  | NH2 | B_ASP.398  | OD2 | 2.596 |
| MODEL | B_ARG.403  | NH1 | B_GLU.406  | OE2 | 2.630 |
| MODEL | B_ARG.403  | NH2 | B_GLU.406  | OE2 | 3.754 |
| MODEL | B_ARG.408  | NH1 | B_ASP.405  | OD1 | 2.895 |
| MODEL | B_ARG.408  | NH1 | B_ASP.405  | OD2 | 2.755 |
| MODEL | B_ARG.408  | NH2 | B_ASP.405  | OD2 | 3.887 |
| MODEL | B_ARG.454  | NH1 | B_ASP.467  | OD2 | 2.590 |
| MODEL | B_LYS.462  | NZ  | B_GLU.465  | OE2 | 3.504 |
| MODEL | B_ARG.509  | NH1 | B_ASP.442  | OD1 | 2.673 |
| MODEL | B_ARG.509  | NH1 | B_ASP.442  | OD2 | 3.881 |
| MODEL | B_LYS.528  | NZ  | B_ASP.389  | OD2 | 2.658 |
| MODEL | B_LYS.535  | NZ  | B_GLU.554  | OE2 | 2.577 |
| MODEL | B_LYS.537  | NZ  | B_GLU.324  | OE1 | 2.634 |
| MODEL | B_LYS.537  | NZ  | B_GLU.324  | OE2 | 2.706 |
| MODEL | B_LYS.557  | NZ  | B_ASP.586  | OD1 | 2.689 |
| MODEL | B_LYS.557  | NZ  | B_ASP.586  | OD2 | 2.627 |
| MODEL | B_ARG.567  | NH1 | B_ASP.571  | OD1 | 2.826 |
| MODEL | B_ARG.567  | NH1 | B_ASP.571  | OD2 | 2.786 |
| MODEL | B_ARG.567  | NH2 | B_ASP.571  | OD1 | 3.551 |
| MODEL | B_HIS.625  | ND1 | B_ASP.627  | OD2 | 3.516 |
| MODEL | B_HIS.625  | NE2 | B_ASP.627  | OD2 | 3.967 |
| MODEL | B_ARG.646  | NH1 | B_ASP.614  | OD2 | 2.839 |
| MODEL | B_LYS.733  | NZ  | B_ASP.775  | OD1 | 3.016 |
| MODEL | B_LYS.733  | NZ  | B_ASP.775  | OD2 | 2.582 |
| MODEL | B_LYS.776  | NZ  | B_GLU.780  | OE1 | 2.710 |
| MODEL | B_LYS.776  | NZ  | B_GLU.780  | OE2 | 2.672 |
| MODEL | B_LYS.790  | NZ  | A_GLU.702  | OE1 | 2.570 |
| MODEL | B_LYS.790  | NZ  | A_GLU.702  | OE2 | 3.570 |
| MODEL | B_ARG.815  | NH1 | B_ASP.820  | OD1 | 2.696 |
| MODEL | B_ARG.815  | NH2 | B_ASP.867  | OD1 | 2.920 |
| MODEL | B_ARG.815  | NH2 | B_GLU.868  | OE2 | 3.311 |

|       |            |     |            |     |       |
|-------|------------|-----|------------|-----|-------|
| MODEL | B.LYS.854  | NZ  | A.ASP.614  | OD1 | 3.487 |
| MODEL | B.ARG.983  | NH2 | B.ASP.979  | OD1 | 2.614 |
| MODEL | B.ARG.983  | NH2 | B.ASP.979  | OD2 | 3.538 |
| MODEL | B.LYS.986  | NZ  | C.ASP.427  | OD2 | 3.985 |
| MODEL | B.ARG.995  | NH1 | C.ASP.994  | OD1 | 2.636 |
| MODEL | B.ARG.995  | NH1 | C.ASP.994  | OD2 | 3.371 |
| MODEL | B.ARG.995  | NH2 | C.ASP.994  | OD1 | 3.182 |
| MODEL | B.ARG.995  | NH2 | C.ASP.994  | OD2 | 2.637 |
| MODEL | B.ARG.1019 | NH1 | B.GLU.773  | OE1 | 3.284 |
| MODEL | B.ARG.1019 | NH1 | B.GLU.773  | OE2 | 2.600 |
| MODEL | B.LYS.1028 | NZ  | B.GLU.725  | OE1 | 2.732 |
| MODEL | B.LYS.1028 | NZ  | B.GLU.725  | OE2 | 2.670 |
| MODEL | B.ARG.1039 | NH1 | B.GLU.1031 | OE1 | 2.669 |
| MODEL | B.ARG.1039 | NH1 | B.GLU.1031 | OE2 | 3.057 |
| MODEL | B.ARG.1039 | NH2 | C.GLU.1031 | OE1 | 2.711 |
| MODEL | B.ARG.1039 | NH2 | C.GLU.1031 | OE2 | 3.989 |
| MODEL | B.LYS.1045 | NZ  | B.ASP.1041 | OD1 | 2.637 |
| MODEL | B.HIS.1064 | NE2 | B.GLU.725  | OE2 | 2.768 |
| MODEL | B.LYS.1086 | NZ  | B.ASP.1084 | OD2 | 2.620 |
| MODEL | C.LYS.97   | NZ  | C.GLU.96   | OE2 | 2.761 |
| MODEL | C.LYS.97   | NZ  | C.ASP.253  | OD1 | 2.693 |
| MODEL | C.LYS.97   | NZ  | C.ASP.253  | OD2 | 2.866 |
| MODEL | C.LYS.113  | NZ  | B.GLU.471  | OE2 | 2.679 |
| MODEL | C.LYS.129  | NZ  | C.GLU.169  | OE1 | 2.582 |
| MODEL | C.LYS.129  | NZ  | C.GLU.169  | OE2 | 2.463 |
| MODEL | C.LYS.150  | NZ  | C.GLU.154  | OE1 | 2.608 |
| MODEL | C.LYS.150  | NZ  | C.GLU.154  | OE2 | 2.752 |
| MODEL | C.ARG.158  | NH2 | C.GLU.154  | OE2 | 3.189 |
| MODEL | C.LYS.187  | NZ  | C.GLU.180  | OE2 | 2.873 |
| MODEL | C.LYS.202  | NZ  | C.ASP.228  | OD2 | 2.762 |
| MODEL | C.ARG.246  | NH1 | C.GLU.156  | OE1 | 2.756 |
| MODEL | C.ARG.246  | NH1 | C.GLU.156  | OE2 | 3.170 |
| MODEL | C.ARG.246  | NH2 | C.GLU.156  | OE1 | 3.528 |
| MODEL | C.ARG.246  | NH2 | C.GLU.156  | OE2 | 2.612 |
| MODEL | C.ARG.273  | NH1 | C.ASP.290  | OD1 | 2.966 |
| MODEL | C.ARG.273  | NH1 | C.ASP.290  | OD2 | 3.840 |
| MODEL | C.ARG.273  | NH2 | C.ASP.290  | OD1 | 2.966 |
| MODEL | C.ARG.273  | NH2 | C.ASP.290  | OD2 | 2.552 |
| MODEL | C.LYS.310  | NZ  | C.ASP.663  | OD1 | 3.129 |
| MODEL | C.ARG.319  | NH1 | A.ASP.745  | OD1 | 3.819 |
| MODEL | C.ARG.328  | NH1 | C.ASP.578  | OD2 | 2.598 |
| MODEL | C.ARG.328  | NH2 | C.ASP.578  | OD1 | 3.708 |
| MODEL | C.ARG.328  | NH2 | C.ASP.578  | OD2 | 2.801 |
| MODEL | C.ARG.355  | NH2 | C.ASP.398  | OD1 | 3.407 |
| MODEL | C.ARG.355  | NH2 | C.ASP.398  | OD2 | 2.579 |
| MODEL | C.LYS.356  | NZ  | C.GLU.340  | OE1 | 2.568 |
| MODEL | C.ARG.403  | NH1 | C.GLU.406  | OE1 | 3.581 |
| MODEL | C.ARG.403  | NH1 | C.GLU.406  | OE2 | 2.672 |
| MODEL | C.ARG.403  | NH2 | C.GLU.406  | OE2 | 2.658 |
| MODEL | C.LYS.458  | NZ  | A.ASP.389  | OD2 | 3.696 |
| MODEL | C.LYS.462  | NZ  | C.GLU.465  | OE1 | 2.614 |
| MODEL | C.LYS.462  | NZ  | C.GLU.465  | OE2 | 2.647 |
| MODEL | C.ARG.509  | NH1 | C.ASP.442  | OD1 | 2.578 |
| MODEL | C.LYS.528  | NZ  | C.ASP.389  | OD1 | 3.189 |
| MODEL | C.LYS.528  | NZ  | C.ASP.389  | OD2 | 3.148 |
| MODEL | C.LYS.535  | NZ  | C.GLU.554  | OE1 | 2.654 |
| MODEL | C.LYS.535  | NZ  | C.GLU.554  | OE2 | 2.723 |
| MODEL | C.LYS.537  | NZ  | C.GLU.324  | OE2 | 2.535 |

|       |            |     |            |     |       |
|-------|------------|-----|------------|-----|-------|
| MODEL | C_LYS.557  | NZ  | C_ASP.568  | OD1 | 2.816 |
| MODEL | C_LYS.557  | NZ  | C_ASP.568  | OD2 | 2.819 |
| MODEL | C_LYS.557  | NZ  | C_ASP.574  | OD1 | 3.661 |
| MODEL | C_LYS.557  | NZ  | C_ASP.574  | OD2 | 2.584 |
| MODEL | C_ARG.567  | NH1 | C_ASP.571  | OD1 | 3.523 |
| MODEL | C_ARG.567  | NH1 | C_ASP.571  | OD2 | 2.610 |
| MODEL | C_ARG.567  | NH2 | C_ASP.571  | OD1 | 2.539 |
| MODEL | C_ARG.567  | NH2 | C_ASP.571  | OD2 | 3.300 |
| MODEL | C_ARG.646  | NH1 | A_ASP.848  | OD2 | 3.643 |
| MODEL | C_ARG.646  | NH2 | A_ASP.848  | OD1 | 3.695 |
| MODEL | C_ARG.646  | NH2 | A_ASP.848  | OD2 | 2.627 |
| MODEL | C_LYS.733  | NZ  | C_ASP.775  | OD1 | 3.066 |
| MODEL | C_LYS.733  | NZ  | C_ASP.775  | OD2 | 2.575 |
| MODEL | C_LYS.811  | NZ  | C_ASP.820  | OD2 | 3.817 |
| MODEL | C_ARG.815  | NH1 | C_ASP.820  | OD1 | 2.929 |
| MODEL | C_ARG.815  | NH1 | C_ASP.820  | OD2 | 2.916 |
| MODEL | C_ARG.815  | NH2 | C_ASP.820  | OD1 | 3.727 |
| MODEL | C_ARG.847  | NH1 | B_GLU.619  | OE1 | 3.034 |
| MODEL | C_LYS.854  | NZ  | B_ASP.614  | OD1 | 2.686 |
| MODEL | C_LYS.986  | NZ  | C_GLU.748  | OE1 | 2.531 |
| MODEL | C_ARG.995  | NH1 | A_ASP.994  | OD1 | 2.647 |
| MODEL | C_ARG.995  | NH1 | A_ASP.994  | OD2 | 3.498 |
| MODEL | C_ARG.995  | NH2 | A_ASP.994  | OD1 | 3.382 |
| MODEL | C_ARG.995  | NH2 | A_ASP.994  | OD2 | 2.636 |
| MODEL | C_ARG.1019 | NH1 | B_GLU.1017 | OE2 | 2.726 |
| MODEL | C_ARG.1019 | NH1 | C_GLU.773  | OE2 | 2.647 |
| MODEL | C_ARG.1019 | NH2 | B_GLU.1017 | OE2 | 3.415 |
| MODEL | C_LYS.1028 | NZ  | C_GLU.725  | OE1 | 2.678 |
| MODEL | C_LYS.1028 | NZ  | C_GLU.725  | OE2 | 2.787 |
| MODEL | C_ARG.1039 | NH1 | C_GLU.1031 | OE1 | 3.735 |
| MODEL | C_ARG.1039 | NH1 | C_GLU.1031 | OE2 | 2.669 |
| MODEL | C_ARG.1039 | NH2 | A_GLU.1031 | OE1 | 3.509 |
| MODEL | C_ARG.1039 | NH2 | A_GLU.1031 | OE2 | 2.596 |
| MODEL | C_HIS.1064 | NE2 | C_GLU.725  | OE1 | 2.774 |
| MODEL | C_LYS.1086 | NZ  | C_ASP.1084 | OD2 | 2.855 |

Table 1: Salt bridging networks within the PDB entries. In this table, the residue naming scheme is **Chain ID\_residue name\_residue number**.

| Count | Residue A | Residue B |
|-------|-----------|-----------|
| 12    | ARG995    | ASP994    |
| 12    | ARG1039   | GLU1031   |
| 9     | ARG567    | ASP571    |
| 8     | ARG328    | ASP578    |
| 8     | ARG273    | ASP290    |
| 6     | ARG403    | GLU406    |
| 6     | LYS733    | ASP775    |
| 6     | LYS1028   | GLU725    |
| 6     | ARG319    | ASP745    |
| 5     | LYS310    | ASP663    |
| 5     | ARG815    | ASP820    |
| 5     | ARG355    | ASP398    |
| 5     | ARG509    | ASP442    |
| 5     | LYS537    | GLU324    |
| 4     | LYS790    | GLU702    |
| 4     | LYS206    | GLU224    |
| 4     | ARG1019   | GLU773    |
| 4     | LYS557    | ASP568    |
| 4     | ARG246    | GLU156    |
| 4     | LYS557    | ASP574    |
| 4     | LYS195    | ASP53     |
| 4     | ARG44     | ASP40     |
| 3     | LYS1086   | ASP1084   |
| 3     | ARG408    | ASP405    |
| 3     | LYS528    | ASP389    |
| 3     | LYS462    | GLU465    |
| 3     | LYS535    | GLU554    |
| 3     | ARG646    | ASP848    |
| 3     | HIS1064   | GLU725    |
| 3     | HIS1083   | ASP1084   |
| 2     | ARG214    | ASP215    |
| 2     | ARG34     | GLU191    |
| 2     | ARG1019   | GLU780    |
| 2     | LYS150    | GLU154    |
| 2     | LYS811    | ASP820    |
| 2     | LYS854    | ASP614    |
| 2     | LYS986    | GLU748    |
| 2     | ARG466    | ASP467    |
| 2     | ARG319    | ASP737    |
| 2     | LYS278    | ASP287    |
| 2     | LYS557    | ASP586    |
| 2     | LYS97     | ASP253    |
| 2     | HIS625    | ASP627    |
| 2     | ARG1019   | GLU1017   |
| 2     | ARG78     | ASP80     |
| 2     | LYS356    | GLU340    |
| 2     | LYS129    | GLU169    |
| 2     | LYS776    | GLU780    |
| 2     | ARG983    | ASP979    |
| 1     | ARG78     | ASP138    |
| 1     | ARG102    | GLU96     |
| 1     | ARG158    | GLU154    |
| 1     | LYS458    | ASP389    |
| 1     | LYS187    | GLU180    |
| 1     | ARG815    | GLU868    |
| 1     | ARG646    | ASP614    |
| 1     | LYS202    | ASP228    |



|   |         |         |
|---|---------|---------|
| 1 | LYS458  | GLU471  |
| 1 | ARG454  | ASP467  |
| 1 | LYS986  | ASP427  |
| 1 | LYS97   | GLU96   |
| 1 | ARG815  | ASP867  |
| 1 | LYS113  | GLU471  |
| 1 | ARG847  | GLU619  |
| 1 | LYS1045 | ASP1041 |

Table 2: Counting of salt bridges within the PDB entries in Table 1.

| PDB | Acceptor (A) | Donor (D) | Hydrogen (H) | D-A (Å) | H-A (Å) | $\angle ADH(^{\circ})$ |
|-----|--------------|-----------|--------------|---------|---------|------------------------|
|-----|--------------|-----------|--------------|---------|---------|------------------------|

Table 3: The side chain and main chain hydrogen bonding networks. In this table, the names of the PDB files correspond to the single NMR structural model split from the NMR ensemble, the residue naming scheme is **Chain ID\_residue name\_residue number**,  $\angle ADH$  represents the angle formed by acceptor (A), donor (D) and hydrogen (H) ( $\angle ADH$ ).

| PDB | Acceptor (A) | Donor (D) | Hydrogen (H) | D-A (Å) | H-A (Å) | $\angle ADH(^{\circ})$ |
|-----|--------------|-----------|--------------|---------|---------|------------------------|
|-----|--------------|-----------|--------------|---------|---------|------------------------|

Table 4: Side chain hydrogen bonding network analysis. In this table, the names of the PDB files correspond to the single NMR structural model split from the NMR ensemble, the residue naming scheme is **Chain ID\_residue name\_residue number**,  $\angle ADH$  represents the angle formed by acceptor (A), donor (D) and hydrogen (H) ( $\angle ADH$ ).

| PDB ID | Residue A  | Atom A | Residue B  | Atom B | Distance (Å) |
|--------|------------|--------|------------|--------|--------------|
| MODEL  | A_ARG.319  | NH1    | B_ASP.737  | OD2    | 2.735        |
| MODEL  | A_ARG.319  | NH1    | B_ASP.745  | OD1    | 3.587        |
| MODEL  | A_ARG.319  | NH2    | B_ASP.737  | OD2    | 3.982        |
| MODEL  | A_LYS.790  | NZ     | C_GLU.702  | OE1    | 2.623        |
| MODEL  | A_LYS.790  | NZ     | C_GLU.702  | OE2    | 2.744        |
| MODEL  | A_ARG.995  | NH1    | B_ASP.994  | OD1    | 3.497        |
| MODEL  | A_ARG.995  | NH1    | B_ASP.994  | OD2    | 2.691        |
| MODEL  | A_ARG.995  | NH2    | B_ASP.994  | OD1    | 2.657        |
| MODEL  | A_ARG.995  | NH2    | B_ASP.994  | OD2    | 3.473        |
| MODEL  | A_ARG.1039 | NH2    | B_GLU.1031 | OE1    | 3.621        |
| MODEL  | A_ARG.1039 | NH2    | B_GLU.1031 | OE2    | 2.620        |
| MODEL  | B_ARG.319  | NH1    | C_ASP.745  | OD1    | 2.606        |
| MODEL  | B_ARG.319  | NH1    | C_ASP.745  | OD2    | 3.565        |
| MODEL  | B_ARG.319  | NH2    | C_ASP.745  | OD1    | 3.325        |
| MODEL  | B_ARG.319  | NH2    | C_ASP.745  | OD2    | 2.636        |
| MODEL  | B_LYS.790  | NZ     | A_GLU.702  | OE1    | 2.570        |
| MODEL  | B_LYS.790  | NZ     | A_GLU.702  | OE2    | 3.570        |
| MODEL  | B_LYS.854  | NZ     | A_ASP.614  | OD1    | 3.487        |
| MODEL  | B_LYS.986  | NZ     | C_ASP.427  | OD2    | 3.985        |
| MODEL  | B_ARG.995  | NH1    | C_ASP.994  | OD1    | 2.636        |
| MODEL  | B_ARG.995  | NH1    | C_ASP.994  | OD2    | 3.371        |
| MODEL  | B_ARG.995  | NH2    | C_ASP.994  | OD1    | 3.182        |
| MODEL  | B_ARG.995  | NH2    | C_ASP.994  | OD2    | 2.637        |
| MODEL  | B_ARG.1039 | NH2    | C_GLU.1031 | OE1    | 2.711        |
| MODEL  | B_ARG.1039 | NH2    | C_GLU.1031 | OE2    | 3.989        |
| MODEL  | C_LYS.113  | NZ     | B_GLU.471  | OE2    | 2.679        |
| MODEL  | C_ARG.319  | NH1    | A_ASP.745  | OD1    | 3.819        |
| MODEL  | C_LYS.458  | NZ     | A_ASP.389  | OD2    | 3.696        |
| MODEL  | C_ARG.646  | NH1    | A_ASP.848  | OD2    | 3.643        |
| MODEL  | C_ARG.646  | NH2    | A_ASP.848  | OD1    | 3.695        |
| MODEL  | C_ARG.646  | NH2    | A_ASP.848  | OD2    | 2.627        |
| MODEL  | C_ARG.847  | NH1    | B_GLU.619  | OE1    | 3.034        |
| MODEL  | C_LYS.854  | NZ     | B_ASP.614  | OD1    | 2.686        |
| MODEL  | C_ARG.995  | NH1    | A_ASP.994  | OD1    | 2.647        |
| MODEL  | C_ARG.995  | NH1    | A_ASP.994  | OD2    | 3.498        |
| MODEL  | C_ARG.995  | NH2    | A_ASP.994  | OD1    | 3.382        |
| MODEL  | C_ARG.995  | NH2    | A_ASP.994  | OD2    | 2.636        |
| MODEL  | C_ARG.1019 | NH1    | B_GLU.1017 | OE2    | 2.726        |
| MODEL  | C_ARG.1019 | NH2    | B_GLU.1017 | OE2    | 3.415        |
| MODEL  | C_ARG.1039 | NH2    | A_GLU.1031 | OE1    | 3.509        |
| MODEL  | C_ARG.1039 | NH2    | A_GLU.1031 | OE2    | 2.596        |

Table 5: Interfacial salt bridging network analysis within the PDB entries. In this table, the residue naming scheme is **Chain ID\_residue name\_residue number**.

| Count | Residue A | Residue B |
|-------|-----------|-----------|
| 12    | ARG995    | ASP994    |
| 6     | ARG319    | ASP745    |
| 6     | ARG1039   | GLU1031   |
| 4     | LYS790    | GLU702    |
| 3     | ARG646    | ASP848    |
| 2     | ARG319    | ASP737    |
| 2     | LYS854    | ASP614    |
| 2     | ARG1019   | GLU1017   |
| 1     | LYS986    | ASP427    |
| 1     | ARG847    | GLU619    |
| 1     | LYS113    | GLU471    |
| 1     | LYS458    | ASP389    |

Table 6: Counting of interfacial salt bridges within the PDB entries in Table 5.
